# Supplementary material for: Genome-scale identification of plant defensin ( PDF ) family genes and molecular characterization of their responses to diverse nutrient stresses in allotetraploid rapeseed
Source: PeerJ journal article supplement (doi:10.7717/peerj.12007), 2021-09-13
Supplement: Supplementary_Figures_and_Tables_staff_KT.docx [file Supplementary_Figures_and_Tables_staff_KT.docx]

**Supplementary Figure S1** Phosphorylation sites of the plant defensin (PDF) proteins in *Arabidopsis thaliana* and *Brassica napus*. The NetPhos (http://www.cbs.dtu.dk/services/

NetPhos/) 3.1 server was used to predict the presence and location of phosphorylation sites in amino acid sequences of the AtPDF and BnaPDF proteins.

**Supplementary Figure S2** Trans-membrane characterization of the plant defensin (PDF) proteins in *Arabidopsis thaliana* and *Brassica napus*. The TMHMM (http://www.cbs.dtu.dk/services/TMHMM/) tool was used to predict the transmembrane topology of the AtPDF and BnaPDF proteins.

**Supplementary Figure S3** Characterization of signal peptides of the plant defensin (PDF) proteins in *Arabidopsis thaliana* and *Brassica napus*. The SignalP (http://www.cbs.dtu.dk/services/SignalP/) 4.0 server was used to predict the presence and location of signal peptide cleavage sites in amino acid sequences of the AtPDF and BnaPDF proteins.

**Supplementary Figure S4** The secondary structure of the plant defensin (PDF) proteins in *Arabidopsis thaliana* and *Brassica napus*. The Phyre2 (http: //www.sbg.bio.ic.ac.uk/phyre2/webscripts/jobmonitor) was used to predict the secondary structure in amino acid sequences of the AtPDF and BnaPDF proteins.

**Supplementary Figure S5** The protein-protein interaction network the plant defensin (PDF) proteins in *Arabidopsis thaliana* and *Brassica napus*. The string (http: https://string-db.org/) was used to predict the protein-protein interaction network in amino acid sequences of the AtPDF and BnaPDF proteins.

**Supplementary Figure S6** Enrichment analysis of cis-acting regulatory elements (CRE) in the promoter region of the plant defensin (PDF) proteins in *Arabidopsis thaliana* and *Brassica napus*.

**Supplementary Figure S7 Results of GO term enrichment analysis of the *plant defensin* (*PDF*) genes in *Brassica napus*.** The GO bar plot represents the top 3 biological (BP) process.

**Supplementary Table S1 Predicted miRNAs targeting the *BnaPDF* genes**

| **miRNA name** | **Target gene ID** | **Gene name** | **Expectation** | **miRNA start** | **miRNA end** | **Target start** | **Target end** | **miRNA aligned fragment** | **alignment** | **Target aligned fragment** | **Inhibition** |
| --- | --- | --- | --- | --- | --- | --- | --- | --- | --- | --- | --- |
| bna-miR164a | BnaA02g33850D | BnaA2.PDF2.5 | 5 | 1 | 21 | 478 | 498 | UGGAGAAGCAGGGCACGUGCA | .:. :::.:: .::.:::: | GCUAUUUGCUCUCUUUUUCCA | Cleavage |
| bna-miR164b | BnaA02g33850D | BnaA2.PDF2.5 | 5 | 1 | 21 | 478 | 498 | UGGAGAAGCAGGGCACGUGCG | .:. :::.:: .::.:::: | GCUAUUUGCUCUCUUUUUCCA | Cleavage |
| bna-miR164c | BnaA02g33850D | BnaA2.PDF2.5 | 5 | 1 | 21 | 478 | 498 | UGGAGAAGCAGGGCACGUGCG | .:. :::.:: .::.:::: | GCUAUUUGCUCUCUUUUUCCA | Cleavage |
| bna-miR164d | BnaA02g33850D | BnaA2.PDF2.5 | 5 | 1 | 21 | 478 | 498 | UGGAGAAGCAGGGCACGUGCG | .:. :::.:: .::.:::: | GCUAUUUGCUCUCUUUUUCCA | Cleavage |
| bna-miR172a | BnaC07g21520D | BnaC7.PDF2.6 | 5 | 1 | 21 | 932 | 952 | AGAAUCUUGAUGAUGCUGCAU | :: ::::: ::: ::::: | AAACACCAUCAGCAAAAUUCU | Translation |
| bna-miR172d | BnaC07g21520D | BnaC7.PDF2.6 | 5 | 1 | 21 | 932 | 952 | AGAAUCUUGAUGAUGCUGCAG | :: ::::: ::: ::::: | AAACACCAUCAGCAAAAUUCU | Translation |
| bna-miR6031 | BnaC07g21520D | BnaC7.PDF2.6 | 5 | 1 | 24 | 1425 | 1448 | AAGAGGUUCGGAGCGGUUUGAAGC | : .: :. :::.::::. :::: | AAUAUAUAUGGCUUCGAAUAUCUU | Cleavage |

Note: alignments, the alignments the miRNA with a portion of its target sequence.
